# Supplementary material
Source: PubMed Central journal article supplement (PMC6834870)
Supplement: NIHMS1028141-supplement-Supp_TableS1-6.pdf [file NIHMS1028141-supplement-Supp_TableS1-6.pdf]

The Quality and Outcomes of Care Provided to Patients with Cirrhosis by Advanced Practice Providers

Elliot B. Tapper MD, Shengchen Hao, Menghan Lin, John N. Mafi, Heather McCurdy NP, Neehar D. Parikh MD, Anna S. Lok MD

**SUPPLEMENTARY MATERIAL**

- Page 2: Condition Definitions using ICD-9 Codes (Table 1)**
- Page 3: Definition of Quality Metrics (Table 2)**
- Page 4: Provider Type and Survival: Competing Risks Analysis (Table 3)**
- Page 5: Provider Type and Survival: Landmark Analysis (Table 4)**
- Page 6: Propensity Score Matching (Table 5)**
- Page 7: Costs associated with APP care (Table 6)**
- Page 8: References**

**Table 1: Condition Definitions using ICD-9 Codes**

|                                | ICD-9 code                                                                                                                                                                                                                                                                                                                                                                                                             |
|--------------------------------|------------------------------------------------------------------------------------------------------------------------------------------------------------------------------------------------------------------------------------------------------------------------------------------------------------------------------------------------------------------------------------------------------------------------|
| Cirrhosis                      | 571.2, 571.5, 571.6                                                                                                                                                                                                                                                                                                                                                                                                    |
| Cirrhosis complications        | 456.0, 789.59, 572.2, 567.23, 572.4                                                                                                                                                                                                                                                                                                                                                                                    |
| History of alcohol use         | 571.2, 571.1, 571.3, 790.3, 425.5, 535.30, 535.51, 577, 357.5, 291.x, 303.x, 305.0x, V113.0, E860.01-.03, 980.x                                                                                                                                                                                                                                                                                                        |
| Hepatitis C                    | 070.41, 070.44, 070.51, 070.54, 070.70, 070.71, v02.62                                                                                                                                                                                                                                                                                                                                                                 |
| Hepatitis B                    | 070.22, 070.23, 070.32, 070.33, 070.2, 070.3, V02.6                                                                                                                                                                                                                                                                                                                                                                    |
| Non-alcohol-related, non-viral | 571.5 NOT Alcohol use, Hepatitis C or Hepatitis B                                                                                                                                                                                                                                                                                                                                                                      |
| Hepatic encephalopathy         | 572.2                                                                                                                                                                                                                                                                                                                                                                                                                  |
| Liver Transplant               | ICD-9CM 50.5; CPT 47135, 47136                                                                                                                                                                                                                                                                                                                                                                                         |
| Hepatocellular Carcinoma       | 155.0                                                                                                                                                                                                                                                                                                                                                                                                                  |
| Paracentesis                   | ICD9CM: 54.91; CPT: 49080, 49081, 49082, 49083, 49084                                                                                                                                                                                                                                                                                                                                                                  |
| Portosystemic shunt            | ICD9CM: 39.1; CPT: 37182, 37183, 37140                                                                                                                                                                                                                                                                                                                                                                                 |
| Endoscopy                      | ICD9CM: 45.16; CPT 43200, 43202, 43204, 43234; CPT: 43235, 43239, 43243, 43244, 43255, 43227, 43204, 43205, 43251                                                                                                                                                                                                                                                                                                      |
| Hepatitis A vaccine            | CPT 90632, 90633, 90634, 90636                                                                                                                                                                                                                                                                                                                                                                                         |
| Hepatitis B vaccine            | CPT 90739, 90740, 90743, 90747; CPT 90636, 90748                                                                                                                                                                                                                                                                                                                                                                       |
| Liver cancer Screening         | CT scan: CPT 74177, 74178, 74160, 74170;<br>MRI CPT 74183;<br>Ultrasound: CPT: 76700, 76705                                                                                                                                                                                                                                                                                                                            |
| Infections                     | pneumonia (481, 482.xx, 483.0, 483.1, 483.8, 484.3, 484.5, 484.8, 485.x, 486.x), sepsis (995.91, 995.92, 785.52, 0380, 0381, 03811, 03812, 03819, 0382-0384, 03840-44, 03849, 0388, 0389), urinary tract infection (599.0, 590.10, 590.11, 590.80), cellulitis (682.0-682.9), bacteremia (790.7), cholangitis (576.1), <i>Clostridium difficile</i> infection (008.45), and spontaneous bacterial peritonitis (567.23) |

**Table 2: Definition of Quality Metrics**

| <b>Metric</b>                                                    | <b>Source</b> | <b>Denominator</b>                                                                           | <b>Numerator</b>                                                                                                                                                                                                       | <b>Limitations</b>                                                                                                                                                                    |
|------------------------------------------------------------------|---------------|----------------------------------------------------------------------------------------------|------------------------------------------------------------------------------------------------------------------------------------------------------------------------------------------------------------------------|---------------------------------------------------------------------------------------------------------------------------------------------------------------------------------------|
| <b>Hepatocellular carcinoma (HCC)</b>                            | (1)           | All patients with cirrhosis without HCC. Patients are censored at the time of HCC diagnosis. | All patients with a liver imaging test performed in the outpatient setting. It is recommended to be performed every 6-12 months.                                                                                       | Screening can be deferred in patients with Child C cirrhosis and life-limiting comorbidities. Recent guidelines recommend screening every 6 months.                                   |
| <b>Screening for varices</b>                                     | (2, 3)        | All patients with cirrhosis without variceal bleeding within 3 months of the index visit.    | All patients with an upper endoscopy performed in the outpatient setting. It is recommend to be performed every 2-3 years in patients with compensated cirrhosis and annually in patients with decompensated cirrhosis | Inpatient endoscopies were not considered screening tests. Unable to accurately account for differences in recommendations for patients with compensated vs. decompensated cirrhosis. |
| <b>Rifaximin after discharge for hepatic encephalopathy (HE)</b> | (4)           | All patients with an admission for HE (inpatient code ICD-9 572.2) on lactulose              | All patients who received rifaximin after discharge                                                                                                                                                                    | Clinicians may defer prescription if out-of-pocket costs are expected to be high. Some HE episodes with clear provoking factor may not benefit from addition of rifaximin.            |

**Table 3: Competing Risks Analysis**

| Variable                                           | Mortality<br>Sub Hazard Ratio<br>(95% Confidence Interval) | Transplantation<br>Sub Hazard Ratio<br>(95% Confidence Interval) |
|----------------------------------------------------|------------------------------------------------------------|------------------------------------------------------------------|
| Age (per year)                                     | 1.038 (1.037 1.038)                                        | 0.973 (0.968 0.978)                                              |
| Female Sex                                         | 0.913 (0.895 0.93)                                         | 0.758 (0.658 0.874)                                              |
| Asian Race                                         | 0.745 (0.705 0.788)                                        | 1.149 (0.801 1.647)                                              |
| African American Race                              | 1.071 (1.042 1.101)                                        | 0.851 (0.692 1.047)                                              |
| Hispanic                                           | 0.678 (0.657 0.699)                                        | 0.76 (0.61 0.947)                                                |
| Charlson comorbidity Index<br>(per point)          | 1.098 (1.092 1.103)                                        | 1.221 (1.175 1.269)                                              |
| Alcoholic Cirrhosis                                | 0.941 (0.907 0.976)                                        | 3.937 (3.123 4.963)                                              |
| Hepatitis C                                        | 0.879 (0.848 0.912)                                        | 5.512 (4.351 6.984)                                              |
| Non-alcoholic, non-viral<br>cirrhosis              | 0.843 (0.812 0.875)                                        | n/a                                                              |
| Ascites                                            | 1.796 (1.754 1.839)                                        | 1.169 (1.006 1.358)                                              |
| Paracentesis                                       | 1.734 (1.681 1.79)                                         | 1.219 (1.013 1.468)                                              |
| Spontaneous Bacterial<br>Peritonitis               | 1.046 (0.984 1.113)                                        | 0.979 (0.756 1.268)                                              |
| Varices                                            | 0.978 (0.949 1.008)                                        | 2.261 (1.908 2.679)                                              |
| Transjugular Intrahepatic<br>Portosystemic Shunt   | 0.947 (0.866 1.036)                                        | 1.954 (1.5 2.545)                                                |
| Hepatic Encephalopathy                             | 1.528 (1.492 1.566)                                        | 2.455 (2.07 2.911)                                               |
| Hepatocellular Carcinoma                           | 1.723 (1.656 1.793)                                        | 2.103 (1.787 2.474)                                              |
| Dialysis                                           | 1.101 (1.055 1.149)                                        | 0.464 (0.299 0.72)                                               |
| <b>Advanced Practice<br/>Provider (APP) visit</b>  | 0.574 (0.551 0.599)                                        | 0.326 (0.213 0.498)                                              |
| <b>Gastroenterology visit<br/>(non-Hepatology)</b> | 1.379 (1.346 1.413)                                        | 1.483 (1.228 1.791)                                              |
| <b>Hepatology visit</b>                            | 0.826 (0.784 0.871)                                        | 2.066 (1.706 2.502)                                              |

Subdistribution-hazard ratios are the product of a Cox Proportional Hazards model for competing risks. 3 competing risks were considered: death, transplantation, and loss-to-follow up. For adjusted models we also included adjustment for number of outpatient visits, shared visits between MDs and APP as well as interaction terms for APP and gastroenterology as well as APP and hepatology. The variable for APP visits included any APP visit (alone or in conjunction with an MD). Finally, in order to adjust further for illness severity, we included diagnosis codes for sepsis, bacteremia, urinary tract infection, pneumonia, clostridium difficile, cellulitis and cholangitis. The number of patients with non-alcoholic, non-viral cirrhosis who received transplant was too few for the transplant outcome (hence 'n/a').

**Table 4: Landmark Analysis**

| Variable                                       | Univariate Hazard Ratio<br>(95% Confidence Interval) | Multivariate Hazard Ratio<br>(95% Confidence Interval) |
|------------------------------------------------|------------------------------------------------------|--------------------------------------------------------|
| Age (per year)                                 | 1.05 [1.05,1.05]                                     | 1.04 [1.04, 1.04]                                      |
| Female Sex                                     | 0.73 [0.71,0.75]                                     | 0.88 [0.85, 0.90]                                      |
| Asian Race                                     | 0.70 [0.65, 0.76]                                    | 0.75 [0.69, 0.82]                                      |
| African American Race                          | 1.03 [0.97, 1.07]                                    | 0.96 [0.93, 1.00]                                      |
| Hispanic                                       | 0.84 [0.81, 0.88]                                    | 0.72 [0.69, 0.75]                                      |
| Charlson comorbidity Index (per point)         | 1.31 [1.30, 1.32]                                    | 1.17 [1.16, 1.18]                                      |
| Alcoholic Cirrhosis                            | 1.63 [1.59, 1.67]                                    | 0.97 [0.93, 1.02]                                      |
| Hepatitis C                                    | 0.95 [0.93, 0.98]                                    | 0.98 [0.94, 1.02]                                      |
| Non-alcoholic, non-viral Cirrhosis             | 0.76 [0.74, 0.78]                                    | 0.87 [0.83, 0.91]                                      |
| Ascites                                        | 2.50 [2.43, 2.57]                                    | 1.80 [1.75, 1.86]                                      |
| Paracentesis                                   | 3.83 [3.71, 3.95]                                    | 2.10 [2.03, 2.19]                                      |
| Spontaneous Bacterial Peritonitis              | 2.98 [2.80, 3.16]                                    | 1.05 [0.98, 1.12]                                      |
| Varices                                        | 2.50 [2.43, 2.57]                                    | 1.80 [1.75, 1.86]                                      |
| Transjugular Intrahepatic Portosystemic Shunt  | 2.24 [2.06, 2.44]                                    | 0.91 [0.83, 1.00]                                      |
| Hepatic Encephalopathy                         | 2.50 [2.43, 2.57]                                    | 1.80 [1.75, 1.86]                                      |
| Hepatocellular Carcinoma                       | 2.54 [2.44, 2.65]                                    | 1.58 [1.50, 1.66]                                      |
| Dialysis                                       | 2.79 [2.66, 2.93]                                    | 1.30 [1.23, 1.37]                                      |
| <b>Advanced Practice Provider (APP) visit</b>  | 0.88 [0.85, 0.90]                                    | 0.80 [0.75, 0.85]                                      |
| <b>Gastroenterology visit (non-Hepatology)</b> | 1.14 [1.11, 1.17]                                    | 1.09 [1.06, 1.13]                                      |
| <b>Hepatology visit</b>                        | 0.88 [0.84, 0.92]                                    | 0.80 [0.75, 0.85]                                      |

To account for the risk of immortal time bias, we performed a landmark analysis setting cohort entry for all patients as the time of first cirrhosis diagnosis. For adjusted models we also included adjustment for number of outpatient visits, shared visits between MDs and APP as well as interaction terms for APP and gastroenterology as well as APP and hepatology. The variable for APP visits included any APP visit (alone or in conjunction with an MD). Finally, in order to adjust further for illness severity, we included diagnosis codes for sepsis, bacteremia, urinary tract infection, pneumonia, clostridium difficile, cellulitis and cholangitis.

**Table 5: Propensity Score Matching**

|                                               | No-APP<br>(n=101,830)        | APP<br>(n=101,830)       |
|-----------------------------------------------|------------------------------|--------------------------|
| Age (average)                                 | 57.00                        | 57.15                    |
| Female Sex                                    | 55%                          | 55%                      |
| Asian Race                                    | 2.1%                         | 2%                       |
| African American Race                         | 10.1%                        | 10.1%                    |
| Hispanic                                      | 9.6%                         | 9.7%                     |
| Alcoholic Cirrhosis                           | 22.5%                        | 23.0%                    |
| Hepatitis C                                   | 11.0%                        | 11.1%                    |
| Ascites                                       | 38.5%                        | 38.8%                    |
| Paracentesis                                  | 1.4%                         | 1.4%                     |
| Spontaneous Bacterial Peritonitis             | 0.4%                         | 0.5%                     |
| Varices                                       | 7.4%                         | 7.5%                     |
| Transjugular Intrahepatic Portosystemic Shunt | 0.1%                         | 0.1%                     |
| Hepatic Encephalopathy                        | 8.0%                         | 8.3%                     |
| Hepatocellular Carcinoma                      | 1.2%                         | 1.3%                     |
| Dialysis                                      | 1.7%                         | 1.9%                     |
| <b>Advanced Practice Provider (APP) visit</b> | <b>Hazard Ratio (95% CI)</b> | <b>0.43 (0.41, 0.45)</b> |

To further account for the risk of confounding by indication, we performed a propensity score matching analysis. Using a 1:1 greedy matching algorithm with a caliper width of 0.2. The association between APP visits and survival is presented as a hazard ratio for transplant-free survival that is further adjusted the number of outpatient visits, shared visits between MDs and APP as well as interaction terms for APP and gastroenterology as well as APP and hepatology. The variable for APP visits included any APP visit (alone or in conjunction with an MD). Finally, in order to adjust further for illness severity, we included diagnosis codes for sepsis, bacteremia, urinary tract infection, pneumonia, clostridium difficile, cellulitis and cholangitis.

**Table 6: Costs Associated with Advanced Practice Providers (APP)**

|                                    | Crude Charges, 2015 USD (Median, IQR) |                      | Incidence Rate Ratios (95% CI) |                      |
|------------------------------------|---------------------------------------|----------------------|--------------------------------|----------------------|
|                                    | APP                                   | Non-APP              | APP<br>Unadjusted              | APP<br>Adjusted      |
| Inpatient charges per person year  | 1,244 (455-3,095)                     | 561 (204-1464)       | 1.340 (1.327, 1.354)           | 1.644 (1.625, 1.664) |
| Outpatient Charges per person year | 6,196 (2,967-12,520)                  | 2,756 (1,213-5,974)  | 1.378 (1.368, 1.389)           | 1.825 (1.810, 1.840) |
| Total Charges                      | 9,619 (5,041-18,183)                  | 4,450, (2,143-9,033) | 1.403 (1.392, 1.413)           | 1.785 (1.771, 1.799) |

**CI= confidence interval, IQR = interquartile range, USD= US dollars**

This analysis of healthcare charges per person-year demonstrates that APP are associated with an increase in expenditures adjusting for confounders. We adjusted estimates for age, race, charlson comorbidities, liver disease etiology, gastroenterology/Hepatology involvement (with an interaction term for APP-GI/Hepatology care), and disease severity (codes for cirrhosis complications). All cost analyses were censored at transplantation.

## References

1. Bruix J, Sherman M. Management of hepatocellular carcinoma: an update. *Hepatology* 2011;53:1020-1022.
2. Qureshi W, Adler DG, Davila R, Egan J, Hirota W, Leighton J, Rajan E, et al. ASGE Guideline: the role of endoscopy in the management of variceal hemorrhage, updated July 2005. *Gastrointestinal endoscopy* 2005;62:651-655.
3. Chalasani N, Younossi Z, Lavine JE, Diehl AM, Brunt EM, Cusi K, Charlton M, et al. The diagnosis and management of non-alcoholic fatty liver disease: Practice Guideline by the American Association for the Study of Liver Diseases, American College of Gastroenterology, and the American Gastroenterological Association. *Hepatology* 2012;55:2005-2023.
4. Vilstrup H, Amodio P, Bajaj J, Cordoba J, Ferenci P, Mullen KD, Weissenborn K, et al. Hepatic encephalopathy in chronic liver disease: 2014 Practice Guideline by the American Association for the Study of Liver Diseases and the European Association for the Study of the Liver. *Hepatology* 2014;60:715-735.
